# Supplementary material
Source: HighWire-hosted journal article supplement (https://cmajopen.ca/highwire/filestream/85282/field_highwire_adjunct_files/1/2020-0302-2-at.pdf)
Supplement: 2020-0302-2-at.pdf [file 2020-0302-2-at.pdf]

Supplementary Table: Baseline characteristics of responders and non-responders

|                                   | <b>Non-responders<br/>N=2066</b> | <b>Responders<br/>N=1321</b> |
|-----------------------------------|----------------------------------|------------------------------|
| Maternal Age                      | N=1712                           | N=1271                       |
| 19 years or younger               | 11 (0.6)                         | 2 (0.2)                      |
| 20-24 years                       | 118 (6.9)                        | 55 (4.3)                     |
| 25-34 years                       | 1203 (70.3)                      | 912 (71.7)                   |
| 35 years or older                 | 380 (22.2)                       | 302 (23.8)                   |
| Maternal Education                | N=2040                           | N=1314                       |
| High school or less               | 283 (13.9)                       | 84 (6.4)                     |
| Some post-secondary               | 308 (15.1)                       | 171 (13.0)                   |
| Graduated post-secondary          | 1188 (58.2)                      | 881 (67.1)                   |
| Post graduate studies             | 261 (12.8)                       | 178 (13.5)                   |
| Family Income                     | N=1985                           | N=1265                       |
| \$39,999 or less                  | 232 (11.7)                       | 66 (5.2)                     |
| \$40,000-59,999                   | 195 (9.8)                        | 103 (8.1)                    |
| \$60,000-79,999                   | 259 (13.0)                       | 160 (12.7)                   |
| \$80,000 or more                  | 1299 (65.4)                      | 936 (74.0)                   |
| Marital Status                    | N=2038                           | N=1314                       |
| Married or Common Law             | 1904 (93.4)                      | 1260 (95.9)                  |
| Single/Divorced/Separated/Widowed | 134 (6.6)                        | 54 (4.1)                     |
| Self-reported ethnicity           | N=2038                           | N=1314                       |
| White                             | 1543 (75.7)                      | 1093 (83.2)                  |
| Minority                          | 495 (24.3)                       | 221 (16.8)                   |
